# Supplementary material
Source: MDPI journal article supplement (https://www.mdpi.com/2073-4344/13/8/1199)
Supplement: s1 [file s1]

## Supplementary material

# Influence of Vacancy Defects on the Interfacial Structural and Optoelectronic Properties of ZnO/ZnS Heterostructures for Photocatalysis

Sajjad Hussain <sup>1,2</sup>, Lingju Guo <sup>1,2</sup> and Tao He <sup>1,2,\*</sup>

<sup>1</sup> CAS Key Laboratory of Nanosystem and Hierarchical Fabrication, National Center for Nanoscience and Technology, Beijing 100190, China

<sup>2</sup> University of Chinese Academy of Sciences, Beijing 100049, China

\* Correspondence: het@nanoctr.cn

**Figure S1.** Optimized unit cells of (a) bulk wurtzite ZnO and (b) bulk cubic ZnS, where red, yellow and silver balls represent oxygen, sulfur and zinc atoms, respectively.

**Figure S2.** Optimized structures of (a) ZnO<sub>6</sub>L and (b) ZnS<sub>2</sub>L surfaces.

**Figure S3.** ZnO layers away from the interface, interface region and top ZnS layer of (a) perfect heterostructure, and heterostructures with (b) V<sub>O</sub>, (c) V<sub>S</sub> and (d) V<sub>Zn</sub>, where red, yellow, silver, green, blue and black balls represent oxygen atom, sulfur atom, zinc atom, V<sub>O</sub>, V<sub>S</sub> and V<sub>Zn</sub>, respectively.

**Figure S4.** Schematic diagram of band alignment for ZnS<sub>2</sub>L and ZnO<sub>6</sub>L before contact, versus normal hydrogen electrode potential.

**Figure S1.** HSE06 calculated band structures of (a) wurtzite ZnO and (b) cubic ZnS by using mixing exchange parameter of 0.375 and screening parameter of 0.20 Å<sup>-1</sup>.

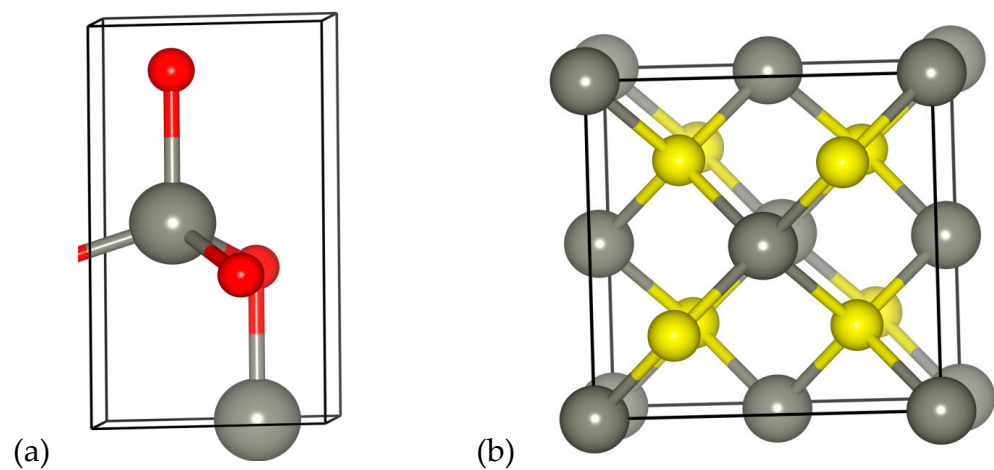

**Figure S1.** Optimized unit cells of (a) bulk wurtzite ZnO and (b) bulk cubic ZnS, where red, yellow and silver balls represent oxygen, sulfur and zinc atoms, respectively.

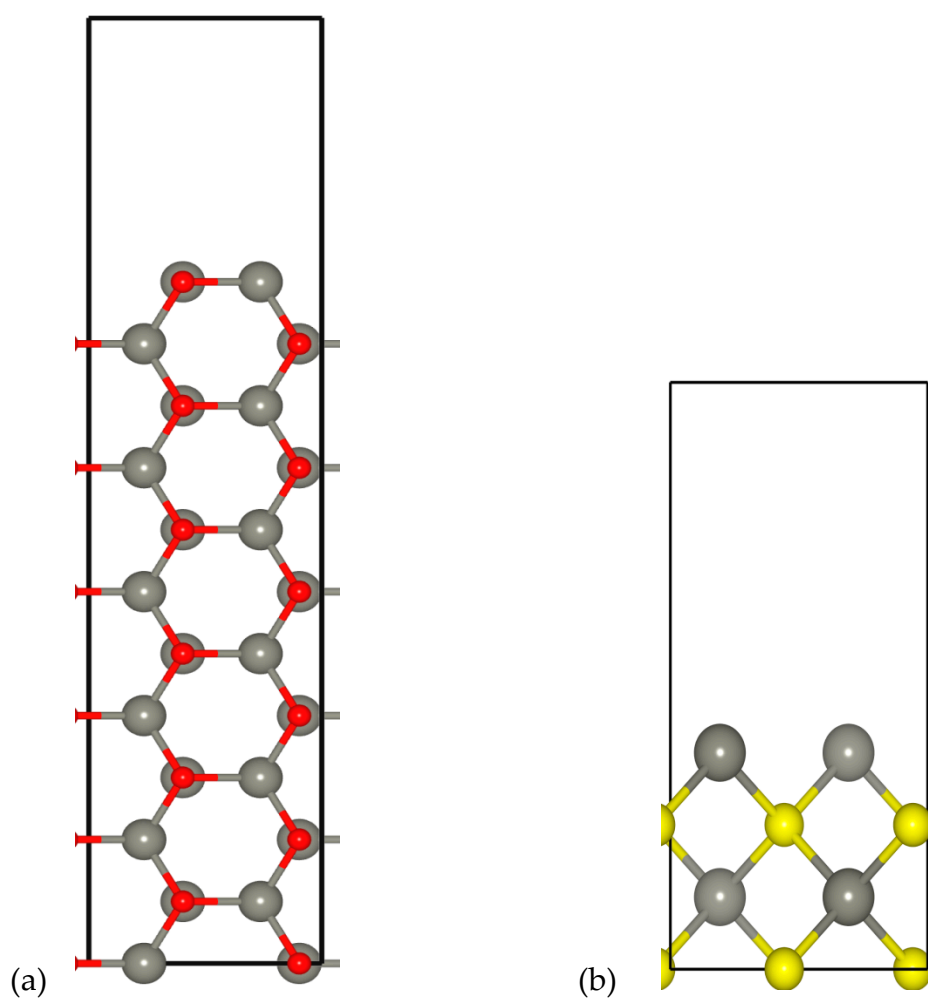

**Figure S2.** Optimized structures of (a) ZnO6L and (b) ZnS2L surfaces..

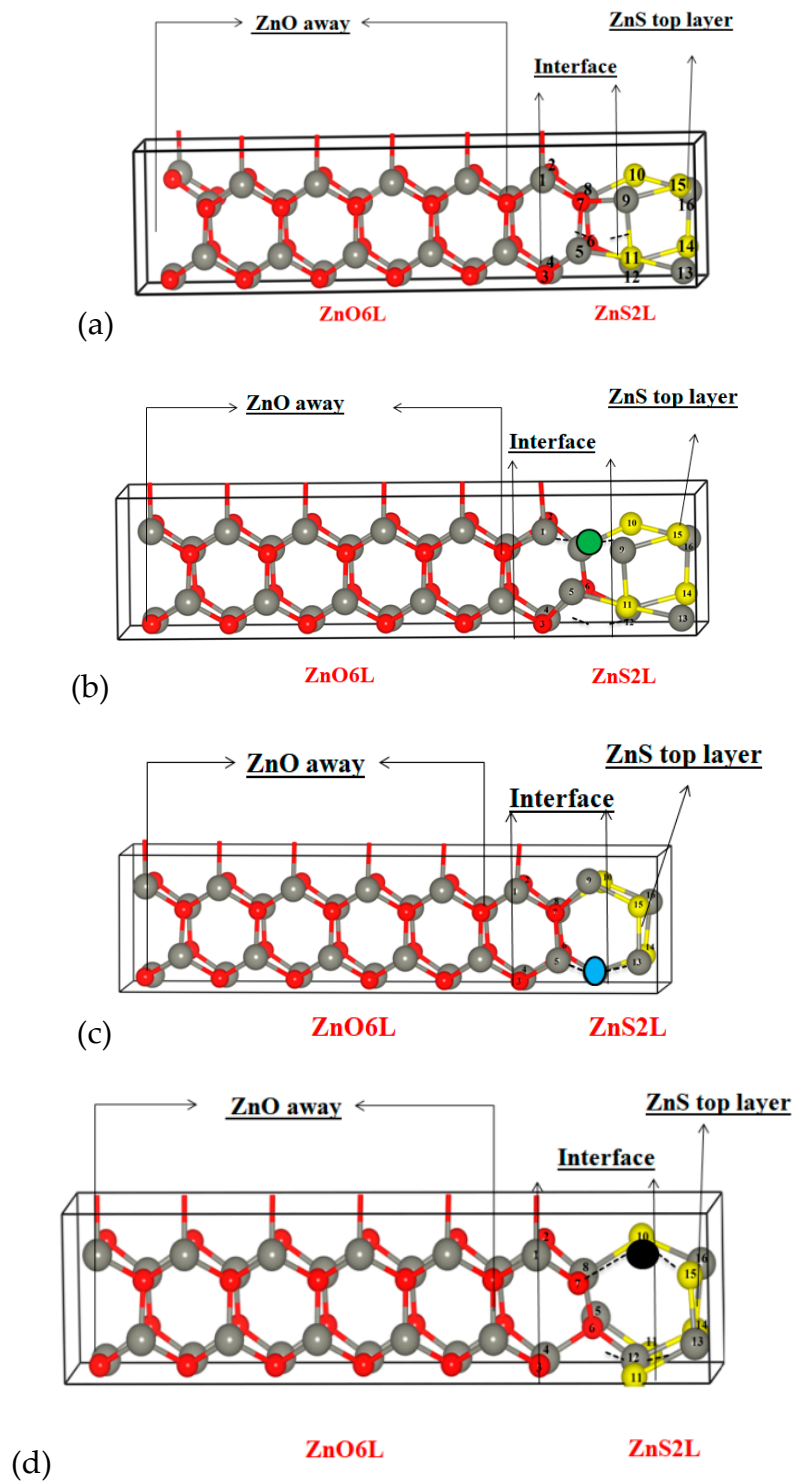

**Figure S3.** ZnO layers away from the interface, interface region and top ZnS layer of (a) perfect heterostructure, and heterostructures with (b)  $V_O$ , (c)  $V_S$  and (d)  $V_{Zn}$ , where red, yellow, silver, green, blue and black balls represent oxygen atom, sulfur atom, zinc atom,  $V_O$ ,  $V_S$  and  $V_{Zn}$ , respectively.

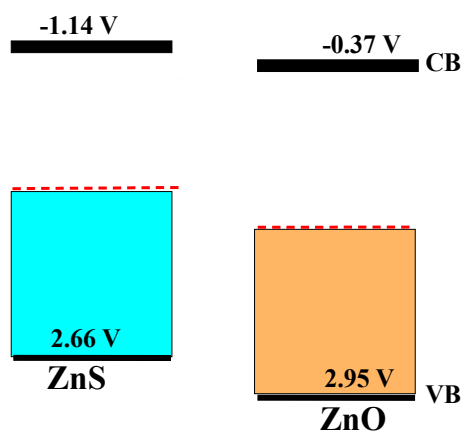

**Figure S4.** Schematic diagram of band alignment for ZnS<sub>2</sub>L and ZnO<sub>6</sub>L before contact, versus normal hydrogen electrode potential.

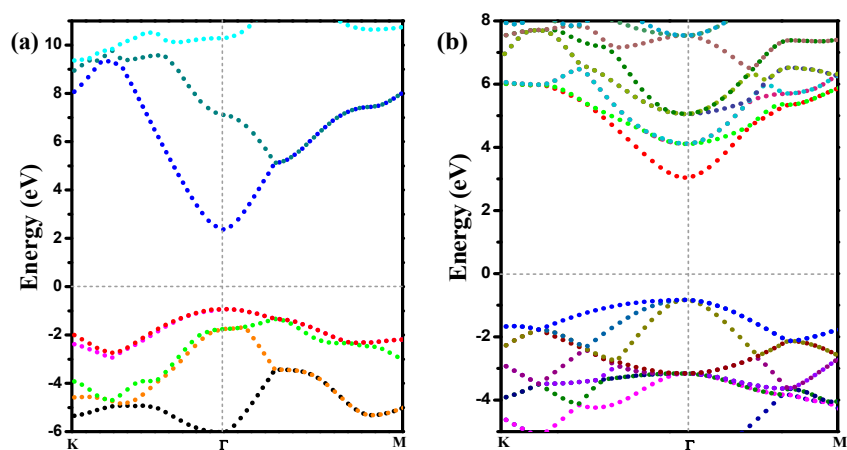

**Figure S2.** HSE06 calculated band structures of (a) wurtzite ZnO and (b) cubic ZnS by using mixing exchange parameter of 0.375 and screening parameter of  $0.20 \text{ \AA}^{-1}$ .
